# Supplementary material
Source: ML conference proceedings conference paper supplement (https://openreview.net/forum?id=m73tETvFkX)
Supplement: supplementary_material [file attachment]

## A APPENDIX

### A.1 IMPLEMENTATION DETAILS

#### A.1.1 ALGORITHM OF ADVPAINT

---

**Algorithm 1** ADVPAINT
 

---

```

1: Input: Clean image  $x$ , perturbation  $\delta$ , mask set  $M$ , extracted feature  $\phi$ , optimization steps  $N$ ,
   step size  $\alpha$ , perturbation budget  $\eta$ , total of  $L$  layers in U-Net, timestep  $T$ 
2: Output: Adversarial example  $x'$ 
3: Initialize  $\delta \sim \mathcal{U}(-\eta, \eta)$ 
4:  $x' \leftarrow x + \delta$ 
5: for mask in  $M$  do
6:    $m \leftarrow$  mask
7:    $x_0 \leftarrow x \otimes m$ 
8:    $x'_0 \leftarrow x' \otimes m$ 
9:   for  $i = 0$  to  $N - 1$  at timestep  $T$  do ▷ Optimization is performed at timestep  $T$  only
10:    for  $l = 1$  to  $L$  do
11:       $(q_s^l, k_s^l, v_s^l) \leftarrow (Q_s^l(\phi(x)), K_s^l(\phi(x)), V_s^l(\phi(x)))$ 
12:       $(q'_s{}^l, k'_s{}^l, v'_s{}^l) \leftarrow (Q_s^l(\phi(x'_i)), K_s^l(\phi(x'_i)), V_s^l(\phi(x'_i)))$ 
13:       $q_c^l, q'_c{}^l \leftarrow Q_c^l(\phi(x)), Q_c^l(\phi(x'_i))$ 
14:    end for
15:     $\mathcal{L}_{attn} \leftarrow \sum_l (\|q_s^l - q'_s{}^l\|^2 + \|k_s^l - k'_s{}^l\|^2 + \|v_s^l - v'_s{}^l\|^2) + \sum_l (\|q_c^l - q'_c{}^l\|^2)$ 
16:     $\delta \leftarrow \delta + \alpha \cdot \text{sign}(\nabla_{x'_i} \mathcal{L}_{attn})$ 
17:     $\delta \leftarrow \text{clip}(\delta, -\eta, \eta)$ 
18:     $x'_{i+1} \leftarrow x_0 + \delta$ 
19:  end for
20:   $x' \leftarrow x'_{N-1}$ 
21: end for

```

---

Algorithm 1 describes the perturbation generation process of ADVPAINT. Note that we optimize our perturbation only at timestep  $T$ , as considering additional timesteps significantly increase computational costs.

#### A.1.2 PRIOR ADVERSARIAL METHODS

For all prior works used as our baselines (Salman et al., 2023; Liang et al., 2023; Liang & Wu, 2023; Xu et al., 2024; Xue et al., 2024), we follow their official implementations to optimize their perturbations. The only adjustment we made is to set the noise level by adjusting the hyperparameter  $\eta$  to 0.06, ensuring that all methods operate under the same noise constraints. We note that all these baselines use PGD for optimizing their perturbations.

Several methods require setting a target latent for optimizing perturbations. For Photoguard (Salman et al., 2023), we use the zero vector as the target latent, which is their default setting. For Mist (Liang & Wu, 2023) and SDST (Xue et al., 2024), we use the target image of Mist for both implementations.

#### A.1.3 THREAT MODEL

In this work, we evaluate our adversarial perturbations across a range of tasks, including inpainting, image-to-image, and text-to-image generation.

**Inpainting task:** We use the Stable Diffusion inpainting pipeline<sup>4</sup> provided by Diffusers (runwayml/stable-diffusion-inpainting). The default settings of the model are applied (inference step  $T=50$ , guidance scale=7.5, strength=1.0, etc.).

<sup>4</sup>[https://huggingface.co/docs/diffusers/api/pipelines/stable\\_diffusion/inpaint](https://huggingface.co/docs/diffusers/api/pipelines/stable_diffusion/inpaint)

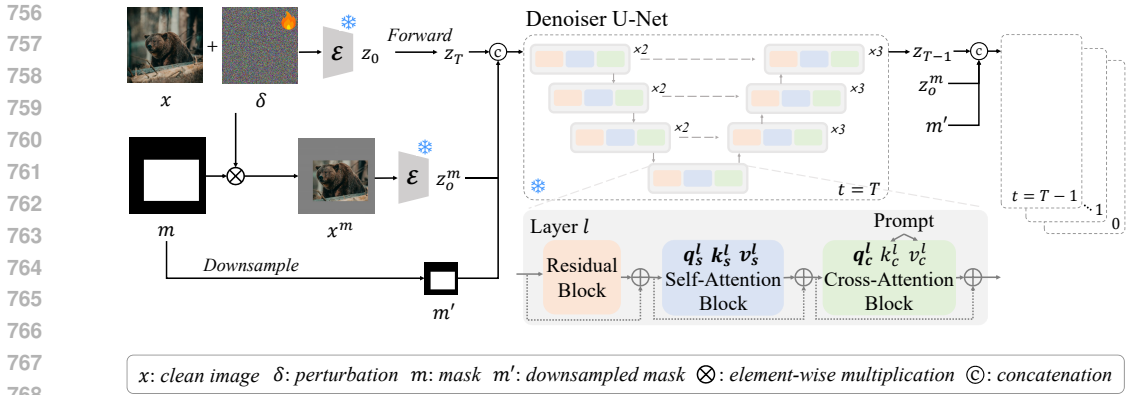

Figure 6: The architecture of the LDM denoiser specifically modified for inpainting tasks. The input image  $x$  and the masked image  $x^m$  share the same encoder  $\epsilon$ . The latent  $z_0^m$  and the resized mask  $m'$  are fed into the model at every timestep. Here,  $c$  denotes from cross-attention and  $s$  stands for self-attention. We optimize the perturbation  $\delta$  by targeting the bolded components in each block of each layer  $l$ .

**Image-to-image task:** For image-to-image translation, we use the Stable Diffusion image-to-image pipeline<sup>5</sup> provided by Diffusers (runwayml/stable-diffusion-v1-5). Specifically, we follow the default settings of the pipeline, where inference steps = 50, strength = 0.8, and guidance scale = 7.5.

**Text-to-image task:** We implement text-to-image generation using the Textual Inversion (Gal et al., 2022) model, following the official implementation and settings from the paper. Specifically, we set the inference steps to 50 and the guidance scale to 7.5. For the input images, where 3 to 5 images are required, we utilized the official dataset of DreamBooth (Ruiz et al., 2022). For both tasks, we used images of 512x512 size and randomly crafted the conditional prompts.

#### A.1.4 GENERATING PROMPTS FOR OPTIMIZATION AND INPAINTING

In the process of generating adversarial perturbations using ADVPAINT, our target inpainting model requires a prompt input as an external condition. For simplicity, we manually set the prompt as a basic {noun} format (e.g. “A gorilla” for gorilla images, “A dog” for dog images).

In the inference phase, as described in 5.1, we generated 50 random prompts using ChatGPT (OpenAI, 2024). For foreground inpainting, the prompts followed the format of {noun} (e.g. “An orange”, “A tiger”). For background inpainting, we generated prompts in the format of {preposition, location} (e.g. “at the riverside.”, “at a wooden fence.”), inserting the prompts used in the perturbation-generation step at the beginning of each generated prompt (e.g. “A gorilla at the riverside.”, “A dog at a wooden fence.”). We followed the prompt setup from Yu et al. (2023b) for fair comparisons.

### A.2 U-NET DENOISER MODIFIED FOR INPAINTING

#### A.2.1 PRELIMINARY: ATTENTION BLOCKS IN LDMs

Rombach et al. (2022) proposed an LDM that leverages self- and cross-attention blocks. The self-attention blocks play a crucial role in generating high-dimensional images by capturing long-range dependencies between spatial regions of input images. Meanwhile, the cross-attention blocks are designed to align the latent image representation with external inputs, such as prompts, during the denoising process, ensuring that the generated image reflects the desired conditioning (Hertz et al., 2022; Tumanyan et al., 2022; Liu et al., 2024).

<sup>5</sup>[https://huggingface.co/docs/diffusers/api/pipelines/stable\\_diffusion/img2img](https://huggingface.co/docs/diffusers/api/pipelines/stable_diffusion/img2img)

| HD-Painter     | Foreground Inpainting |                   |                  |                |                   |                  | Background Inpainting |                   |                  |                |                   |                  |
|----------------|-----------------------|-------------------|------------------|----------------|-------------------|------------------|-----------------------|-------------------|------------------|----------------|-------------------|------------------|
|                | $m^{seg}$             |                   |                  | $m^{bb}$       |                   |                  | $m^{seg}$             |                   |                  | $m^{bb}$       |                   |                  |
|                | FID $\uparrow$        | Prec $\downarrow$ | LPIPS $\uparrow$ | FID $\uparrow$ | Prec $\downarrow$ | LPIPS $\uparrow$ | FID $\uparrow$        | Prec $\downarrow$ | LPIPS $\uparrow$ | FID $\uparrow$ | Prec $\downarrow$ | LPIPS $\uparrow$ |
| Photoguard     | 153.46                | 0.8552            | 0.5632           | 132.63         | 0.8962            | 0.5446           | 93.46                 | 0.5978            | 0.3064           | 127.90         | 0.3246            | 0.4400           |
| AdvDM          | 155.44                | 0.6180            | 0.4807           | 134.54         | 0.7032            | 0.4707           | 75.85                 | 0.7278            | 0.2538           | 109.28         | 0.4738            | 0.3617           |
| SDST           | 146.85                | 0.8568            | 0.4462           | 128.88         | 0.9038            | 0.4456           | 87.64                 | 0.6042            | 0.2896           | 127.85         | 0.3366            | 0.4120           |
| <b>ADVPAIN</b> | <b>178.71</b>         | <b>0.5350</b>     | <b>0.5770</b>    | <b>156.51</b>  | <b>0.6276</b>     | <b>0.5754</b>    | <b>164.10</b>         | <b>0.3310</b>     | <b>0.3998</b>    | <b>264.79</b>  | <b>0.1748</b>     | <b>0.5232</b>    |

Table 4: Quantitative comparison for HD-Painter (Manukyan et al., 2023).

| DreamShaper    | Foreground Inpainting |                   |                  |                |                   |                  | Background Inpainting |                   |                  |                |                   |                  |
|----------------|-----------------------|-------------------|------------------|----------------|-------------------|------------------|-----------------------|-------------------|------------------|----------------|-------------------|------------------|
|                | $m^{seg}$             |                   |                  | $m^{bb}$       |                   |                  | $m^{seg}$             |                   |                  | $m^{bb}$       |                   |                  |
|                | FID $\uparrow$        | Prec $\downarrow$ | LPIPS $\uparrow$ | FID $\uparrow$ | Prec $\downarrow$ | LPIPS $\uparrow$ | FID $\uparrow$        | Prec $\downarrow$ | LPIPS $\uparrow$ | FID $\uparrow$ | Prec $\downarrow$ | LPIPS $\uparrow$ |
| Photoguard     | 188.08                | 0.7422            | 0.5878           | 157.90         | 0.8544            | 0.5792           | 103.74                | 0.6112            | 0.3361           | 131.61         | 0.3074            | 0.4840           |
| AdvDM          | 183.74                | 0.5114            | 0.5080           | 152.55         | 0.6540            | 0.5001           | 84.99                 | 0.7102            | 0.2846           | 115.41         | 0.4340            | 0.3992           |
| SDST           | 179.80                | 0.7792            | 0.4682           | 151.38         | 0.8656            | 0.4725           | 98.67                 | 0.5954            | 0.3149           | 132.79         | 0.2978            | 0.4446           |
| <b>ADVPAIN</b> | <b>230.53</b>         | <b>0.3856</b>     | <b>0.6042</b>    | <b>186.27</b>  | <b>0.5196</b>     | <b>0.6092</b>    | <b>177.68</b>         | <b>0.3160</b>     | <b>0.4317</b>    | <b>266.85</b>  | <b>0.1622</b>     | <b>0.5561</b>    |

Table 5: Quantitative comparison for DreamShaper (DreamShaper, 2024).

| SD-2-Inp.      | Foreground Inpainting |                   |                  |                |                   |                  | Background Inpainting |                   |                  |                |                   |                  |
|----------------|-----------------------|-------------------|------------------|----------------|-------------------|------------------|-----------------------|-------------------|------------------|----------------|-------------------|------------------|
|                | $m^{seg}$             |                   |                  | $m^{bb}$       |                   |                  | $m^{seg}$             |                   |                  | $m^{bb}$       |                   |                  |
|                | FID $\uparrow$        | Prec $\downarrow$ | LPIPS $\uparrow$ | FID $\uparrow$ | Prec $\downarrow$ | LPIPS $\uparrow$ | FID $\uparrow$        | Prec $\downarrow$ | LPIPS $\uparrow$ | FID $\uparrow$ | Prec $\downarrow$ | LPIPS $\uparrow$ |
| Photoguard     | 239.73                | 0.5102            | 0.6226           | 199.21         | 0.7000            | 0.6071           | 110.33                | 0.4570            | 0.3798           | 126.74         | 0.1712            | 0.5094           |
| AdvDM          | 249.57                | 0.1902            | 0.5393           | 199.22         | 0.3636            | 0.5246           | 89.66                 | 0.5942            | 0.3027           | 114.39         | 0.2610            | 0.4197           |
| SDST           | 231.96                | 0.5324            | 0.5001           | 201.65         | 0.6756            | 0.4996           | 106.61                | 0.4718            | 0.3569           | 130.00         | 0.1892            | 0.4710           |
| <b>ADVPAIN</b> | <b>325.14</b>         | <b>0.0926</b>     | <b>0.6452</b>    | <b>264.72</b>  | <b>0.2160</b>     | <b>0.6443</b>    | <b>198.32</b>         | <b>0.2210</b>     | <b>0.4633</b>    | <b>267.91</b>  | <b>0.0842</b>     | <b>0.5756</b>    |

Table 6: Quantitative comparison for Stable-Diffusion-2-Inpainting model.

## A.2.2 ARCHITECTURE OF INPAINTING LDM

We demonstrate the architecture of inpainting LDM in Figure 6. This model takes three inputs: the original image  $x$ , the mask  $m$ , and the masked image  $x^m = x \otimes m$ , where  $\otimes$  represents element-wise multiplication. The shared encoder  $\mathcal{E}$  produces two latent vectors,  $z_0$  and  $z_0^m$ .

The denoiser U-Net consists of 16 layers, each comprising a sequence of residual, self-attention, and cross-attention blocks, along with skip connections. As in the default LDM, the denoiser predicts the noise added to the latent and denoises the latent  $z_t$  at each timestep  $t$ . The resulting denoised latent  $z_{t-1}$  is then concatenated with  $z_0^m$  and  $m'$  for the next denoising step. Note that After the denoising for inference steps  $T$ , the denoised latent  $z_0'$  is then inserted to the same decoder  $\mathcal{D}$  of default LDM to generate the inpainted image.

## A.3 TRANSFERABILITY OF ADVPAIN

### A.3.1 VARIANTS OF INPAINTING MODELS

We conducted extensive experiments on multiple inpainting model variants: HD-Painter (Manukyan et al., 2023), DreamShaper (DreamShaper, 2024), and the Stable Diffusion v2 inpainting model (Stability AI, n.d.). For all the variants, we follow the default settings of the official code and we also follow the default settings in the paper, only replacing the inpainting model to one of the variants.

In Table 4, 5, and 6, we evaluate ADVPAIN against these variants using FID, precision, and LPIPS metrics and compared it with other baseline protection methods. Even when the architecture differed significantly (e.g., HD-Painter) or when fine-tuning changed the model parameters (e.g., DreamShaper, SD-2-inpainting), ADVPAIN consistently outperform earlier protection methods across all metrics. Qualitative results are depicted in Figure 7, 8, and 9.

### 864 A.3.2 IMAGE-TO-IMAGE AND TEXT-TO-IMAGE TASKS

865  
866 We demonstrate the transferability of ADVPAINT to image-to-image and text-to-image tasks in Fig-  
867 ure 10 and 11. While prior methods targeting these tasks effectively protect images from manipula-  
868 tions, our approach also delivers competitive safeguarding results.

### 871 A.3.3 DiT-BASED GENERATION MODELS

872  
873 DiT (Peebles & Xie, 2022) suggests a new paradigm in text-to-image generation tasks by applying  
874 vision transformers to Latent Diffusion Models, which decreases model complexity and increases  
875 generation quality. We evaluated the robustness of ADVPAINT against an adversary using the in-  
876 painting model of Flux (Labs, n.d.) and text-to-image model Pixart- $\delta$  (Chen et al., 2024) which  
877 leverages a diffusion transformer. Unlike Pixart- $\delta$ , we note that models like DiT and Pixart- $\alpha$  (Chen  
878 et al., 2023) are designed for generating images solely from text prompts using diffusion transformer  
879 architectures, which make them unsuitable for our tasks that require accepting input images.

880 **Flux** provides an inpainting module based on multimodal and parallel diffusion transformer blocks.  
881 We utilized the “black-forest-labs/FLUX.1-schnell” checkpoint and the image size was set to  
882 512x512 to match our settings.

883 As shown in Figure 12, ADVPAINT effectively disrupts the inpainting process by causing misalign-  
884 ment between generated regions and unmasked areas. For example, it generates cartoon-style cows  
885 in (a) and adds a new rabbit in (b), while also producing noisy patterns in the unmasked areas of the  
886 images.

887 **Chen et al.** have proposed Pixart- $\delta$  which incorporates DreamBooth (Ruiz et al., 2022) into DiT.  
888 We chose this work for the adversary’s generative model since it supports feeding an input image  
889 along with a command prompt for performing generation.

890 As shown in Figure 13 (a), AdvPaint-generated perturbations consistently undermine the generation  
891 ability of Pixart- $\delta$ . Furthermore, AdvPaint also renders noise patterns that degrade the image quality  
892 on the resulting output images of the diffusion model, which aligns with the behavior of previous  
893 methods (*i.e.* Photoguard, AdvDM, SDST).

894  
895 ADVPAINT also effectively disrupts the original DreamBooth (Ruiz et al., 2022), as shown in Fig-  
896 ure 13 (b). However, our findings indicate that ADVPAINT and the previous methods are less effec-  
897 tive against Pixart- $\delta$  that leverages DiT, as shown in Figure 13 (a). Additionally, compared to the  
898 results of LDM-based inpainting models in Figure 1, current methods are less effective when ap-  
899 plied to DiTs. Discernible objects are generated in the foreground inpainting tasks and new objects  
900 according to the prompts are not always generated. We believe this ineffectiveness stems from the  
901 distinct characteristic of DiT, which processes patchified latent representations. ADVPAINT and our  
902 baselines are specifically designed to target LDMs, which utilize the entire latent representation as  
903 input, allowing perturbations to be optimized over the complete latent space. Thus, when latents are  
904 patchified in DiTs, perturbations may become less effective at disrupting the model’s processing,  
905 thereby diminishing their protective capability. This discrepancy necessitates further research to de-  
906 velop protection methods specifically tailored to safeguard images against the adversary misusing  
907 DiT-based models. For instance, optimizing perturbations at the patch level rather than across the  
908 entire latent representation could prove more effective in countering the unique paradigm of image  
909 generation in DiT-based models.

### 910 A.4 DIFFERENT PROMPTS FOR VARIOUS INPAINTING TASKS

911  
912 In real-world scenarios, the exact prompts used by adversaries to maliciously modify images remain  
913 unknown. To simulate and analyze potential attack vectors, we conduct experiments using a diverse  
914 set of prompts that are likely candidates for foreground and background inpainting tasks.

915  
916 Please note that below experiments were conducted under the same default settings (*i.e.* using the  
917 Stable Diffusion Inpainting model with a total of 100 images and 50 prompts per image), ensuring  
a fair and consistent comparison.

| Optim. Methods | (a) FG Inpainting |                   |                  |                |                   |                  | (b) BG Inpainting |                   |                  |                |                   |                  |
|----------------|-------------------|-------------------|------------------|----------------|-------------------|------------------|-------------------|-------------------|------------------|----------------|-------------------|------------------|
|                | $m^{seg}$         |                   |                  | $m^{bb}$       |                   |                  | $m^{seg}$         |                   |                  | $m^{bb}$       |                   |                  |
|                | FID $\uparrow$    | Prec $\downarrow$ | LPIPS $\uparrow$ | FID $\uparrow$ | Prec $\downarrow$ | LPIPS $\uparrow$ | FID $\uparrow$    | Prec $\downarrow$ | LPIPS $\uparrow$ | FID $\uparrow$ | Prec $\downarrow$ | LPIPS $\uparrow$ |
| Photoguard     | 161.44            | 0.0874            | 0.6415           | 129.99         | 0.2158            | 0.6171           | 144.21            | 0.5230            | 0.4063           | 153.63         | 0.2280            | 0.5317           |
| AdvDM          | 160.54            | 0.0658            | 0.5167           | 127.36         | 0.1266            | 0.5122           | 118.13            | 0.6228            | 0.3168           | 131.58         | 0.2720            | 0.4311           |
| SDST           | 148.57            | 0.1340            | 0.4930           | 120.55         | 0.2456            | 0.4882           | 139.86            | 0.5112            | 0.3810           | 152.73         | 0.2280            | 0.4892           |
| ADVPAIN        | <b>331.27</b>     | <b>0.0036</b>     | <b>0.6706</b>    | <b>275.48</b>  | <b>0.0264</b>     | <b>0.6697</b>    | <b>291.12</b>     | <b>0.3490</b>     | <b>0.4948</b>    | <b>355.94</b>  | <b>0.1152</b>     | <b>0.6014</b>    |

Table 7: Quantitative comparison with a diverse set of prompts that are likely candidates for foreground and background inpainting tasks. We set prompts as (a) {noun} that describes the *mask-covered* object and (b) {preposition, location}.

| IMPRESS   | Foreground Inpainting |                   |                  |                |                   |                  | Background Inpainting |                   |                  |                |                   |                  | PSNR           |
|-----------|-----------------------|-------------------|------------------|----------------|-------------------|------------------|-----------------------|-------------------|------------------|----------------|-------------------|------------------|----------------|
|           | $m^{seg}$             |                   |                  | $m^{bb}$       |                   |                  | $m^{seg}$             |                   |                  | $m^{bb}$       |                   |                  |                |
|           | FID $\uparrow$        | Prec $\downarrow$ | LPIPS $\uparrow$ | FID $\uparrow$ | Prec $\downarrow$ | LPIPS $\uparrow$ | FID $\uparrow$        | Prec $\downarrow$ | LPIPS $\uparrow$ | FID $\uparrow$ | Prec $\downarrow$ | LPIPS $\uparrow$ |                |
| Photogard | 182.62                | 0.6510            | 0.5564           | 151.05         | 0.7990            | 0.5522           | 106.54                | 0.4954            | 0.4333           | 118.30         | 0.2158            | 0.5361           | 28.5925        |
| AdvDM     | 209.21                | 0.3764            | 0.5387           | 165.99         | 0.5708            | 0.5336           | 84.63                 | 0.6132            | 0.3351           | 103.76         | 0.2734            | 0.4429           | 29.1283        |
| SDST      | 199.28                | 0.6252            | 0.5307           | 164.13         | 0.7432            | 0.5271           | 104.75                | 0.4852            | 0.4124           | 121.10         | 0.2130            | 0.5090           | 28.8105        |
| ADVPAIN   | <b>299.07</b>         | <b>0.1614</b>     | <b>0.6667</b>    | <b>237.05</b>  | <b>0.3300</b>     | <b>0.6623</b>    | <b>161.24</b>         | <b>0.3230</b>     | <b>0.4730</b>    | <b>214.38</b>  | <b>0.1360</b>     | <b>0.5756</b>    | <b>28.6303</b> |

Table 8: Quantitative evaluation of inpainting results after applying IMPRESS (Cao et al., 2023).

#### A.4.1 FOREGROUND INPAINTING

In the experiments throughout the paper, prompts follow the format of {noun} for foreground inpainting tasks. Here, we evaluate the robustness of ADVPAIN using a different kind of prompt: a prompt that describes the *mask-covered* object itself. For example, we used the prompt “A man” for an input image describing a male and performed an inpainting task to generate another male image.

As demonstrated in Table 7 (a), ADVPAIN successfully disrupted the adversary’s inpainting task, resulting in the generation of an image with no discernible object. This is because the perturbation optimized to disrupt the attention mechanism successfully redirects the attention to other unmasked areas as explained in Section 5.2 and Figure 3. We demonstrate the qualitative examples in Figure 14.

#### A.4.2 BACKGROUND INPAINTING

For background tasks throughout the paper, prompts follow the format of simple noun that describes the object in the image added to preposition, location. Here, we experiment with prompts where the noun describing the object is omitted and evaluate their effectiveness in undermining the adversary’s background inpainting task. Specifically, we assumed the adversary might adjust the prompt to exclude the object (e.g., using “rocky slope” instead of “A monkey on a rocky slope”) to mitigate artifacts. In all cases, ADVPAIN outperformed all baselines, as demonstrated in the Table 7 (b). Qualitative results are depicted in Figure 15.

#### A.5 ROBUSTNESS OF ADVPAIN AGAINST PURIFICATION METHODS

We conducted experiments under the same settings as outlined in the paper ( *i.e.* 100 images, 50 prompts per image, segmentation and bounding box masks, etc.) to evaluate the robustness of ADVPAIN against the recent purification techniques, including IMPRESS (Cao et al., 2023) and Honig

| Gaussian   | Foreground Inpainting |                   |                  |                |                   |                  | Background Inpainting |                   |                  |                |                   |                  | PSNR    |
|------------|-----------------------|-------------------|------------------|----------------|-------------------|------------------|-----------------------|-------------------|------------------|----------------|-------------------|------------------|---------|
|            | $m^{seg}$             |                   |                  | $m^{bb}$       |                   |                  | $m^{seg}$             |                   |                  | $m^{bb}$       |                   |                  |         |
|            | FID $\uparrow$        | Prec $\downarrow$ | LPIPS $\uparrow$ | FID $\uparrow$ | Prec $\downarrow$ | LPIPS $\uparrow$ | FID $\uparrow$        | Prec $\downarrow$ | LPIPS $\uparrow$ | FID $\uparrow$ | Prec $\downarrow$ | LPIPS $\uparrow$ |         |
| Photoguard | 185.20                | 0.6808            | 0.8665           | 156.79         | 0.7814            | 0.8382           | 127.17                | 0.4322            | 0.6111           | 136.26         | 0.1958            | <b>0.7659</b>    | 20.1484 |
| AdvDM      | 181.57                | 0.6730            | 0.8343           | 152.97         | 0.7864            | 0.8094           | 120.80                | 0.4460            | 0.5896           | 128.89         | 0.2084            | 0.7387           | 20.2824 |
| SDST       | 185.04                | 0.6810            | 0.8507           | 154.38         | 0.7838            | 0.8228           | 123.37                | 0.4332            | 0.6006           | 135.07         | 0.2104            | 0.7546           | 20.2358 |
| ADVPAIN    | <b>187.48</b>         | <b>0.6682</b>     | <b>0.8697</b>    | <b>157.74</b>  | <b>0.7804</b>     | <b>0.8411</b>    | <b>128.94</b>         | <b>0.4056</b>     | <b>0.6125</b>    | <b>139.56</b>  | <b>0.1820</b>     | 0.7618           | 20.2410 |

Table 9: Quantitative evaluation of inpainting results after applying Gaussian Noise.

| Upscaling       | Foreground Inpainting |                   |                  |                |                   |                  | Background Inpainting |                   |                  |                |                   |                  | PSNR    |
|-----------------|-----------------------|-------------------|------------------|----------------|-------------------|------------------|-----------------------|-------------------|------------------|----------------|-------------------|------------------|---------|
|                 | $m^{seg}$             |                   |                  | $m^{bb}$       |                   |                  | $m^{seg}$             |                   |                  | $m^{bb}$       |                   |                  |         |
|                 | FID $\uparrow$        | Prec $\downarrow$ | LPIPS $\uparrow$ | FID $\uparrow$ | Prec $\downarrow$ | LPIPS $\uparrow$ | FID $\uparrow$        | Prec $\downarrow$ | LPIPS $\uparrow$ | FID $\uparrow$ | Prec $\downarrow$ | LPIPS $\uparrow$ |         |
| Photoguard      | 136.96                | 0.8042            | 0.2476           | 111.39         | <b>0.8820</b>     | 0.2562           | 60.49                 | 0.8086            | 0.2639           | 62.65          | 0.5630            | 0.2842           | 30.2422 |
| AdvDM           | <b>137.97</b>         | 0.8078            | <b>0.3112</b>    | <b>115.98</b>  | 0.8844            | <b>0.3164</b>    | 63.14                 | 0.7886            | <b>0.2895</b>    | 65.65          | 0.5428            | <b>0.3339</b>    | 29.5016 |
| Mist            | 136.57                | <b>0.8008</b>     | 0.2474           | 112.77         | 0.8922            | 0.2576           | 61.18                 | 0.7932            | 0.2632           | 64.92          | 0.5442            | 0.2823           | 30.0934 |
| <b>ADVPAINT</b> | 137.24                | 0.8132            | 0.2784           | 115.43         | 0.8844            | 0.2851           | <b>65.18</b>          | <b>0.7782</b>     | 0.2840           | <b>66.61</b>   | <b>0.5376</b>     | 0.3068           | 29.8244 |

Table 10: Quantitative evaluation of inpainting results after applying Upscaling method.

| JPEG            | Foreground Inpainting |                   |                  |                |                   |                  | Background Inpainting |                   |                  |                |                   |                  | PSNR    |
|-----------------|-----------------------|-------------------|------------------|----------------|-------------------|------------------|-----------------------|-------------------|------------------|----------------|-------------------|------------------|---------|
|                 | $m^{seg}$             |                   |                  | $m^{bb}$       |                   |                  | $m^{seg}$             |                   |                  | $m^{bb}$       |                   |                  |         |
|                 | FID $\uparrow$        | Prec $\downarrow$ | LPIPS $\uparrow$ | FID $\uparrow$ | Prec $\downarrow$ | LPIPS $\uparrow$ | FID $\uparrow$        | Prec $\downarrow$ | LPIPS $\uparrow$ | FID $\uparrow$ | Prec $\downarrow$ | LPIPS $\uparrow$ |         |
| Photoguard      | 178.67                | 0.7146            | 0.3830           | 144.72         | 0.8366            | 0.3790           | 101.84                | 0.5662            | 0.3736           | 117.19         | 0.2880            | 0.3969           | 29.6323 |
| AdvDM           | <b>183.50</b>         | <b>0.6800</b>     | <b>0.4400</b>    | <b>150.11</b>  | 0.8126            | <b>0.4318</b>    | 106.74                | 0.5394            | 0.3782           | 120.36         | <b>0.2614</b>     | <b>0.4134</b>    | 29.4626 |
| SDST            | 179.31                | 0.7214            | 0.3956           | 145.99         | 0.8284            | 0.3914           | 104.13                | 0.5564            | 0.3783           | 118.56         | 0.2710            | 0.4003           | 29.5710 |
| <b>ADVPAINT</b> | 183.44                | 0.6894            | 0.4126           | 149.74         | <b>0.8110</b>     | 0.4080           | <b>108.70</b>         | <b>0.5150</b>     | <b>0.3837</b>    | <b>124.74</b>  | 0.2712            | 0.4084           | 29.6232 |

Table 11: Quantitative evaluation of inpainting results after applying JPEG compression.

|                 | PSNR    |
|-----------------|---------|
| Photoguard      | 31.6608 |
| AdvDM           | 32.5213 |
| SDST            | 32.4273 |
| <b>ADVPAINT</b> | 32.3779 |

Table 12: PSNR comparison of ADVPAINT and baseline methods where they are equally set with  $\eta = 0.06$ .

et al. (2024). Please note that among the four suggested methods in Honig et al. (2024), we evaluated the two methods for which official code is available in the current time of writing this paper—Gaussian noise addition and upscaling—while the others could not be tested due to the lack of accessible implementations. For the purification methods, we follow the Pytorch implementation for JPEG compression with quality 15 and official codes for other methods where Gaussian noise strength is set to 0.05.

In Table 8, ADVPAINT retains its protective ability even against IMPRESS, outperforming baseline methods in terms of FID, Precision, and LPIPS. Since IMPRESS uses LPIPS loss to ensure the purified image remains visually close to the perturbed image, we believe this objective inadvertently preserves a part of the adversarial perturbation. Qualitative results are depicted in Figure 16.

We observed that both ADVPAINT and the previous methods lose their ability to protect images when subjected to Gaussian noise addition, upscaling (Honig et al., 2024), and JPEG compression. In Table 9, 10, and 11, the FID, Precision, and LPIPS scores indicate significant degradation in protection under these conditions.

However, as depicted in the Figure 17 (a) and (c) regarding Gaussian noise addition and JPEG compression, *the inpainted results are noisy and blurry* (e.g. noisy backgrounds for (a) “sunflower” and (c) “bicycle” images) compared to images generated from non-protected input. This raises concerns about their visual quality. It calls into question the practicality of noise-erasing methods, as the generated images often fail to meet acceptable quality standards.

Additionally, we observed a critical drawback in existing purification methods: *they tend to degrade the quality of the purified image itself*. As shown in Table 12, ADVPAINT and baseline methods in our experiments leveraged PGD with  $\eta = 0.06$ , ensuring adversarial examples retained a PSNR around 32 dB. On the other hand, after purification (e.g., via upscaling), we observed a PSNR drop of approximately 2.5 dB for ADVPAINT, with similar reductions observed for other methods. This decline highlights a significant trade-off between the purification effectiveness and input image quality. Qualitative results after these purification methods are depicted in Figure 17.

| Noise Level $\eta$     | Foreground Inpainting |                   |                  |                |                   |                  | Background Inpainting |                   |                  |                |                   |                  | PSNR           |
|------------------------|-----------------------|-------------------|------------------|----------------|-------------------|------------------|-----------------------|-------------------|------------------|----------------|-------------------|------------------|----------------|
|                        | $m^{seg}$             |                   |                  | $m^{bb}$       |                   |                  | $m^{seg}$             |                   |                  | $m^{bb}$       |                   |                  |                |
|                        | FID $\uparrow$        | Prec $\downarrow$ | LPIPS $\uparrow$ | FID $\uparrow$ | Prec $\downarrow$ | LPIPS $\uparrow$ | FID $\uparrow$        | Prec $\downarrow$ | LPIPS $\uparrow$ | FID $\uparrow$ | Prec $\downarrow$ | LPIPS $\uparrow$ |                |
| 0.04                   | 319.54                | 0.1298            | 0.6056           | 268.58         | 0.2578            | 0.6138           | 170.37                | 0.3040            | 0.4603           | 247.31         | 0.1090            | 0.5602           | 35.2832        |
| <b>ADVPaint (0.06)</b> | <b>347.88</b>         | <b>0.0570</b>     | <b>0.6731</b>    | <b>289.63</b>  | <b>0.1536</b>     | <b>0.6762</b>    | <b>219.07</b>         | <b>0.2148</b>     | <b>0.5064</b>    | <b>303.90</b>  | <b>0.0936</b>     | <b>0.6105</b>    | <b>32.3779</b> |
| 0.08                   | 368.37                | 0.0320            | 0.7446           | 311.58         | 0.0992            | 0.7447           | 250.44                | 0.1630            | 0.5506           | 330.50         | 0.0782            | 0.6575           | 29.9798        |
| 0.1                    | 376.69                | 0.0226            | 0.7846           | 326.70         | 0.0642            | 0.7829           | 266.12                | 0.1432            | 0.5780           | 340.51         | 0.0818            | 0.6831           | 28.3171        |

Table 13: Quantitative evaluation of inpainting results for  $\eta = 0.04, 0.06, 0.08, 0.1$ . Results of ADVPaint are in bolded letters.

| Iter. Steps           | Foreground Inpainting |                   |                  |                |                   |                  | Background Inpainting |                   |                  |                |                   |                  |
|-----------------------|-----------------------|-------------------|------------------|----------------|-------------------|------------------|-----------------------|-------------------|------------------|----------------|-------------------|------------------|
|                       | $m^{seg}$             |                   |                  | $m^{bb}$       |                   |                  | $m^{seg}$             |                   |                  | $m^{bb}$       |                   |                  |
|                       | FID $\uparrow$        | Prec $\downarrow$ | LPIPS $\uparrow$ | FID $\uparrow$ | Prec $\downarrow$ | LPIPS $\uparrow$ | FID $\uparrow$        | Prec $\downarrow$ | LPIPS $\uparrow$ | FID $\uparrow$ | Prec $\downarrow$ | LPIPS $\uparrow$ |
| 50                    | 336.39                | 0.0826            | 0.6575           | 284.00         | 0.1872            | 0.6650           | 197.29                | 0.2736            | 0.4894           | 274.99         | 0.1122            | 0.5942           |
| 100                   | 343.72                | 0.0728            | 0.6720           | 287.60         | 0.1744            | 0.6781           | 207.59                | 0.2308            | 0.5087           | 296.83         | 0.0894            | 0.6082           |
| 150                   | 339.79                | 0.0794            | 0.6598           | 285.29         | 0.1898            | 0.6654           | 204.49                | 0.2672            | 0.4958           | 293.95         | 0.1178            | 0.5974           |
| <b>ADVPaint (250)</b> | <b>347.88</b>         | <b>0.0570</b>     | <b>0.6731</b>    | <b>289.63</b>  | <b>0.1536</b>     | <b>0.6762</b>    | <b>219.07</b>         | <b>0.2148</b>     | <b>0.5064</b>    | <b>303.90</b>  | <b>0.0936</b>     | <b>0.6105</b>    |

Table 14: Quantitative evaluation of inpainting results for iteration steps = 50, 100, 150, 250. Results of ADVPaint are in bolded letters.

## A.6 ABLATION STUDY OF NOISE LEVELS AND ITERATION STEPS

### A.6.1 ANALYSIS OF NOISE LEVELS

In Table 13, we conducted an experiment with different values of  $\eta$ , ranging from 0.04 to 0.1. While the PSNR values of adversarial examples increase as  $\eta$  increases, we observed consistent improvements across all evaluation metrics, including FID, precision, and LPIPS. For ADVPaint, we set  $\eta$  to 0.06, as it effectively balances protection against inpainting tasks with the quality of the protected image, achieving a PSNR of approximately 32 dB.

### A.6.2 ANALYSIS OF ITERATION STEPS

In Table 14, we experimented with varying iteration steps. We evaluated iteration steps ranging from 50 to 150. Due to memory limitations, we set the default iteration steps to 250 in ADVPaint, as higher iterations result in memory overload. The results show that while there may not be significant improvement for iteration steps around 100 and 150, optimizing for 250 steps consistently outperforms lower iteration counts, validating our choice of 250 steps as the default setting for ADVPaint.

## A.7 ADDITIONAL QUANTITATIVE RESULTS

In Table 15, we conduct a simple experiment to evaluate the impact of replacing the objective functions in our baseline models. Specifically, we use the same Latent Diffusion Model (LDM) as the baselines but substitute their objective functions—replacing Eq. 2 (e.g., AdvDM, CAAT) and Eq. 4 (e.g., Photoguard) with our proposed attention loss (Eq. 8). Since attention blocks are also present in this *default LDM*, our attention loss is directly applicable. After optimizing perturbations targeting the LDM, we generate inpainted results using the Stable Diffusion inpainting model.

| Optim. Methods             | Foreground Inpainting |                   |                  |                |                   |                  | Background Inpainting |                   |                  |                |                   |                  |
|----------------------------|-----------------------|-------------------|------------------|----------------|-------------------|------------------|-----------------------|-------------------|------------------|----------------|-------------------|------------------|
|                            | $m^{seg}$             |                   |                  | $m^{bb}$       |                   |                  | $m^{seg}$             |                   |                  | $m^{bb}$       |                   |                  |
|                            | FID $\uparrow$        | Prec $\downarrow$ | LPIPS $\uparrow$ | FID $\uparrow$ | Prec $\downarrow$ | LPIPS $\uparrow$ | FID $\uparrow$        | Prec $\downarrow$ | LPIPS $\uparrow$ | FID $\uparrow$ | Prec $\downarrow$ | LPIPS $\uparrow$ |
| LDM + $\mathcal{L}_{attn}$ | 258.63                | 0.3276            | 0.6221           | 209.34         | 0.5202            | 0.6057           | 103.89                | 0.5610            | 0.3872           | 135.07         | 0.2274            | 0.5010           |
| <b>ADVPaint</b>            | <b>347.88</b>         | <b>0.0570</b>     | <b>0.6731</b>    | <b>289.63</b>  | <b>0.1536</b>     | <b>0.6762</b>    | <b>219.07</b>         | <b>0.2148</b>     | <b>0.5064</b>    | <b>303.90</b>  | <b>0.0936</b>     | <b>0.6105</b>    |

Table 15: Quantitative comparison with optimization applied to the default LDM using the same objective as ADVPaint. LDM refers to the model used in our baseline models (e.g. Photoguard, AdvDM, CAAT, etc.).

1080 The results indicate that, while optimized with our proposed objective, the perturbations fail to pro-  
1081 vide effective protection against inpainting tasks, underperforming compared to ADVPAINT. Fur-  
1082 thermore, compared to rows 2–6 in Table 1 (i.e., baseline models), replacing the objective function  
1083 with our attention loss does not result in a significant improvement in performance.

1084 We attribute this to the lack of direct targeting of inpainting models, which limits their ability to  
1085 counter inpainting-specific attacks. This highlights a key limitation of current protection methods  
1086 that rely on the *default LDM* for inpainting tasks and underscores the critical importance of designing  
1087 defensive methods specifically tailored for such tasks.

## 1089 A.8 ADDITIONAL QUALITATIVE RESULTS

### 1091 A.8.1 SINGLE- AND MULTI-OBJECT IMAGES

1092 We present additional qualitative results for inpainting tasks of *single-object* images, comparing  
1093 our method with prior protection approaches in Figure 18, demonstrating the effectiveness of AD-  
1094 VPAINT in protecting against both foreground and background inpainting with diverse masks in  
1095 Figure 19. These results confirm the robustness of our method across various masks and prompts.

1096 For the optimization process of *multi-object* images, we first position ourselves as content own-  
1097 ers and select the objects that may be at risk of malicious inpainting modifications. Then, ADV-  
1098 PAINT performs PGD optimization for each object using enlarged bounding box masks generated  
1099 by Grounded SAM. After optimizing each object, the leftover background regions, where objects  
1100 potentially at risk do not exist, are also optimized. In Figure 20, we clarify the masks used to  
1101 optimize multi-object images, aiding comprehension. After securing each object, we conducted  
1102 experiments with a variety of mask types, including single-object masks, masks for other objects,  
1103 combined-object masks, and their inverted versions. Figure 21 demonstrates the robustness of ADV-  
1104 PAINT for multi-object images. For example, since ADVPAINT optimizes each object individually,  
1105 it ensures protection for each object, resulting in inpainted images that lack discernable objects in  
1106 the foreground. Furthermore, ADVPAINT is robust to masks that encompass all objects, as shown by  
1107 the absence of "two cameras" replacing "two dogs" in inpainted images. Additionally, the method  
1108 effectively secures background regions when inverted masks are used for inpainting tasks. These re-  
1109 sults substantiate the effectiveness of ADVPAINT's per-object protection method, even for complex  
1110 multi-object scenarios.

### 1112 A.8.2 ALTERNATIVE RESOURCES FOR PROMPT GENERATION AND MASK CREATION

1113 We conducted additional experiments employing alternative resources for prompt generation and  
1114 mask creation to evaluate the robustness and generalizability of ADVPAINT's protection perfor-  
1115 mance. For prompt generation, in addition to ChatGPT, we utilized Claude 3.5 Sonnet to generate  
1116 diverse prompts. For mask generation, we replaced Grounded SAM with the zero-shot segmentation  
1117 method proposed by Yu et al. (2023a), which employs CLIP (Radford et al., 2021) to create object  
1118 masks based on the given prompt. As depicted in Figure 22, ADVPAINT retains its protection per-  
1119 formance for inpainting tasks, comparable to its performance when using ChatGPT and Grounded  
1120 SAM. However, as shown in Figure 23, we observe that the segmentation results from Yu et al.  
1121 (2023a) are generally less accurate compared to those generated by Grounded SAM. This reinforces  
1122 our choice of Grounded SAM as the primary segmentation tool, while also validating ADVPAINT's  
1123 adaptability to alternative segmentation approaches.

### 1125 A.8.3 MASKS EXCEEDING OR OVERLAPPING THE OPTIMIZATION BOUNDARY

1126 Since ADVPAINT leverages enlarged bounding box of the object in an image to optimize effective  
1127 perturbations, one may be curious about if ADVPAINT is also robust to real-world inpainting scenar-  
1128 ios where masks vary in sizes and shapes. In addition to the experiment conducted in Section 5.6, we  
1129 conducted additional experiments using masks that exceed or overlap with the optimization bound-  
1130 ary. Specifically, we visualized inpainting results where foreground masks were applied to regions  
1131 without objects, simulating adversarial scenarios aimed at generating new objects in the background.  
1132 As depicted in Figure 24, ADVPAINT remains robust in such diverse inpainting cases that reflect the  
1133 potential threat from adversaries.



1134

1135

1136

1137

1138

1139

1140

1141

1142

1143

1144

1145

1146

1147

1148

1149

1150

1151

1152

1153

1154

1155

1156

1157

1158

1159

1160

1161

1162

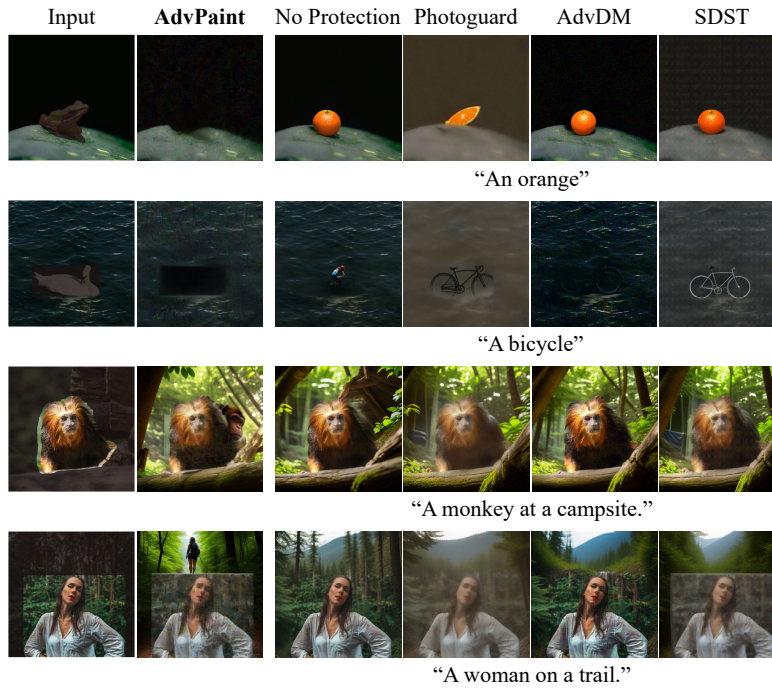

Figure 7: Qualitative inpainting results of HD-Painater (Manukyan et al., 2023).

1163

1164

1165

1166

1167

1168

1169

1170

1171

1172

1173

1174

1175

1176

1177

1178

1179

1180

1181

1182

1183

1184

1185

1186

1187

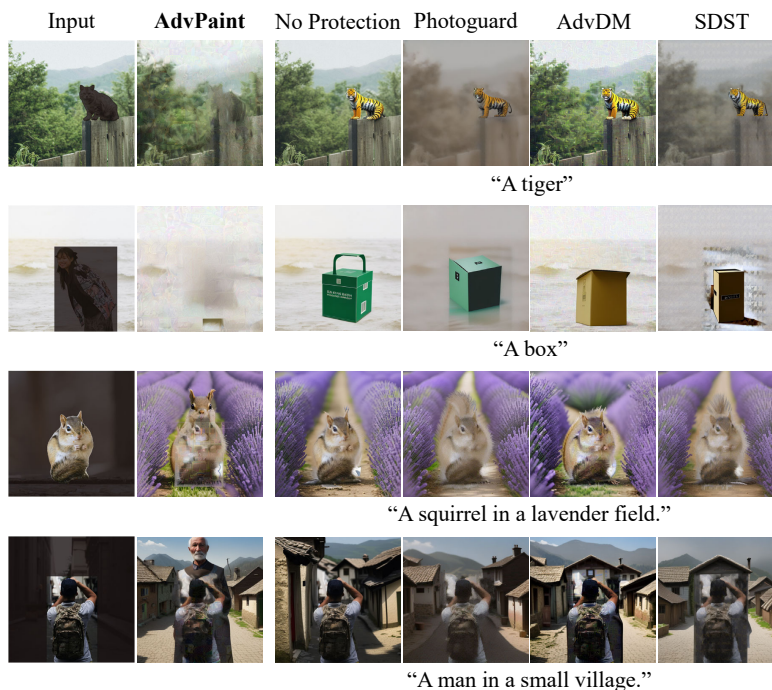

Figure 8: Qualitative inpainting results of DreamShaper (DreamShaper, 2024).

1188  
1189  
1190  
1191  
1192  
1193  
1194  
1195  
1196  
1197  
1198  
1199  
1200  
1201  
1202  
1203  
1204  
1205  
1206  
1207  
1208  
1209  
1210  
1211  
1212  
1213  
1214  
1215  
1216  
1217  
1218  
1219  
1220  
1221  
1222  
1223  
1224  
1225  
1226  
1227  
1228  
1229  
1230  
1231  
1232  
1233  
1234  
1235  
1236  
1237  
1238  
1239  
1240  
1241

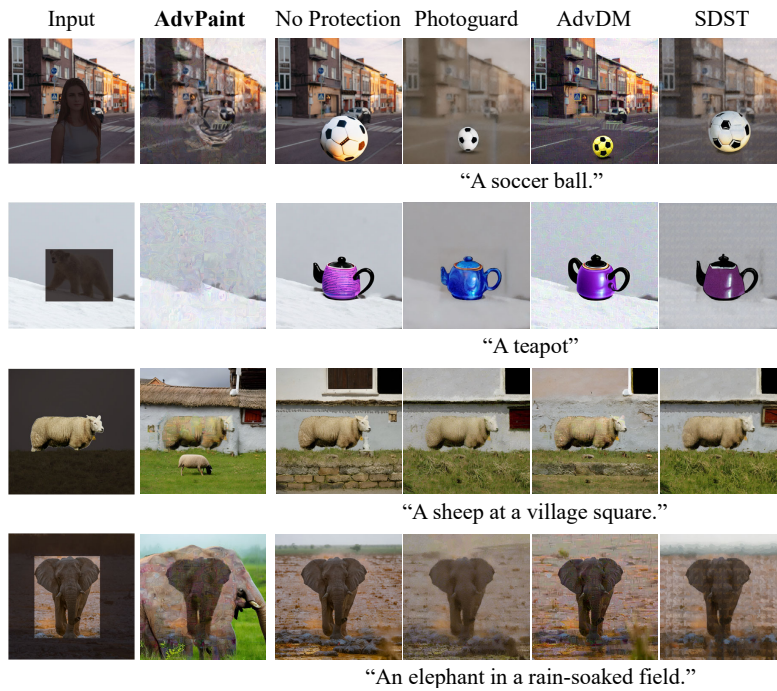

Figure 9: Qualitative inpainting results of Stable-Diffusion-2-Inpainting model.

1242

1243

1244

1245

1246

1247

1248

1249

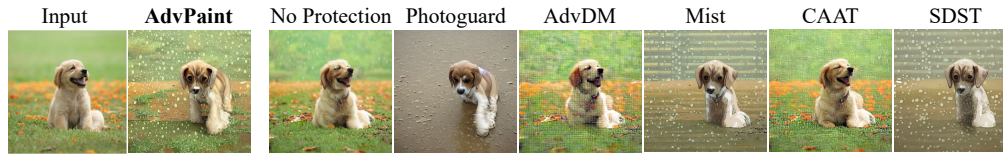

“Dog under heavy rain and muddy ground, real.”

1250

1251

1252

1253

1254

1255

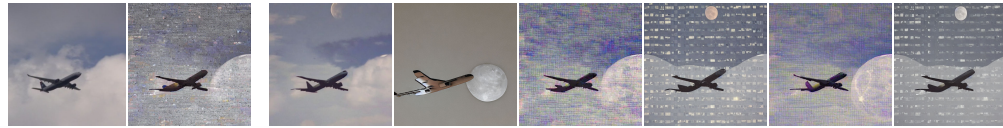

“An airplane flying under the moon.”

1256

1257

1258

1259

1260

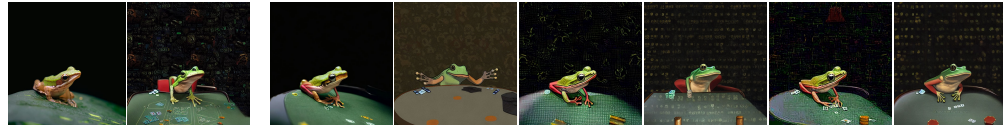

“A frog playing poker.”

1261

1262

1263

1264

1265

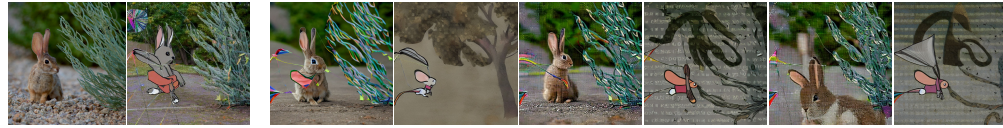

“A rabbit flying a kite.”

1266

Figure 10: Comparison in image-to-image translation task. The results are generated via Stable Diffusion image-to-image pipeline.

1269

1270

1271

1272

1273

1274

1275

1276

1277

1278

1279

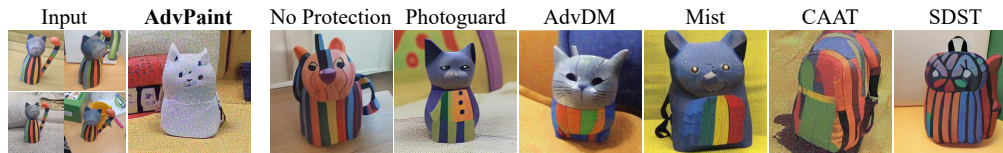

“A \* backpack”

1280

1281

1282

1283

1284

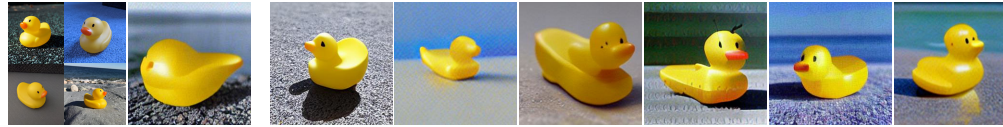

“A photo of \* boat”

1285

1286

1287

1288

1289

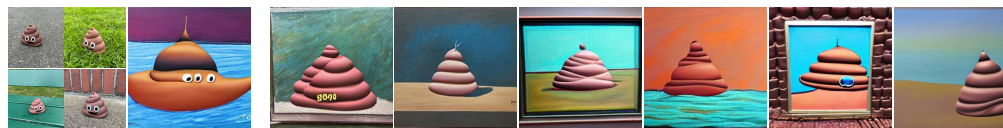

“An oil painting of \* ”

1291

Figure 11: Comparison of text-to-image generation. The \* in the prompts indicates the representative prompt corresponding to the input images. The results are generated via Textual Inversion (Gal et al., 2022).

1294

1295

1296  
1297  
1298  
1299  
1300  
1301  
1302  
1303  
1304  
1305  
1306  
1307  
1308  
1309  
1310  
1311  
1312  
1313  
1314  
1315  
1316  
1317  
1318  
1319  
1320  
1321  
1322  
1323  
1324  
1325  
1326  
1327  
1328  
1329  
1330  
1331  
1332  
1333  
1334  
1335  
1336  
1337  
1338  
1339  
1340  
1341  
1342  
1343  
1344  
1345  
1346  
1347  
1348  
1349

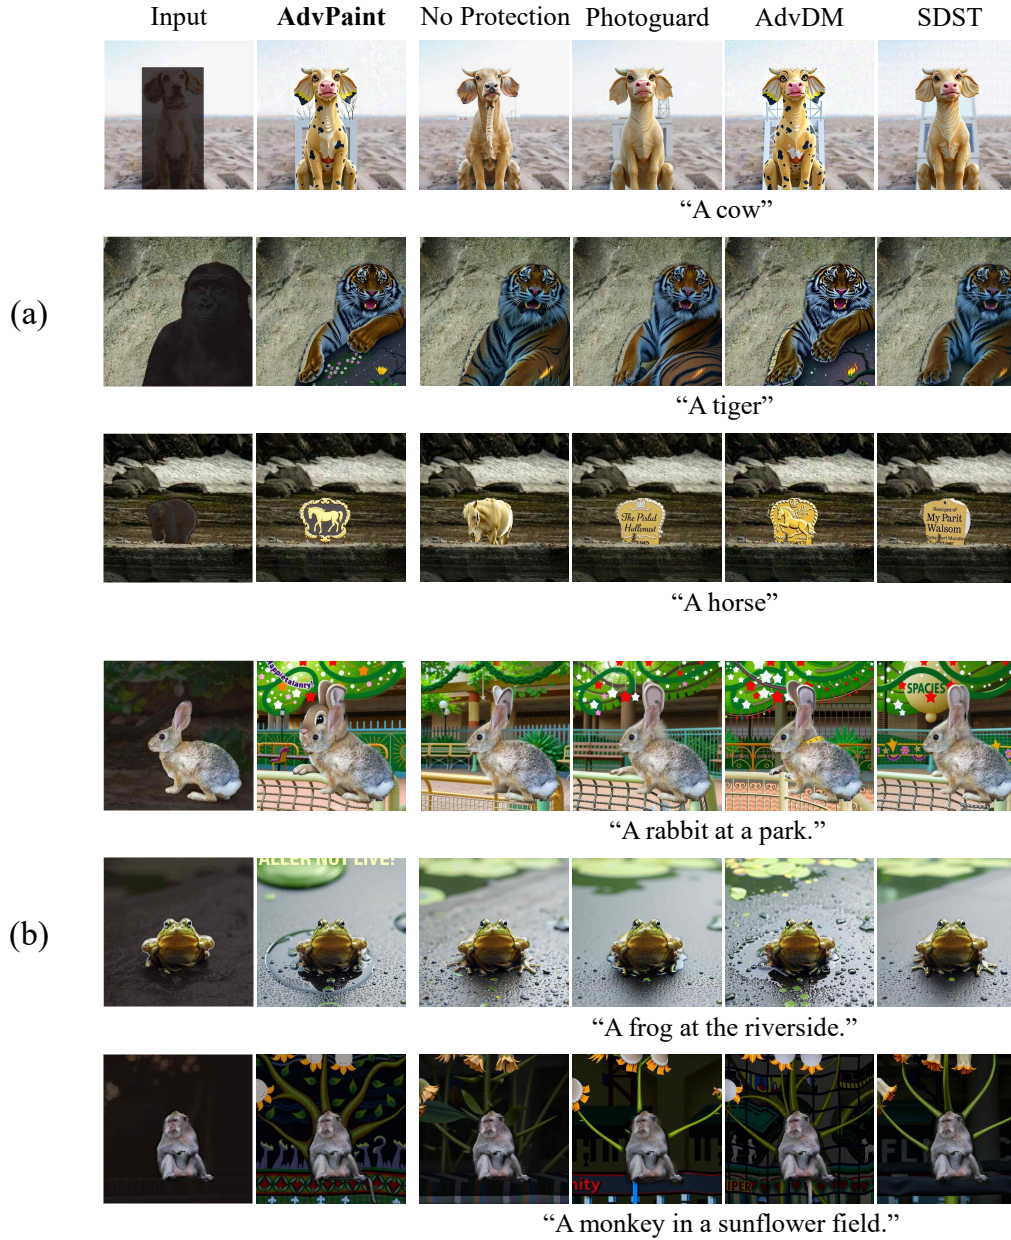

Figure 12: Qualitative results of ADVPAINT and baseline models applied to Flux (Labs, n.d.). Results demonstrate the transferability of ADVPAINT to DiT-based inpainting models, causing misalignment between generated regions and unmasked areas in both (a) foreground and (b) background inpainting tasks. Dark parts in the input image indicate the masked regions.

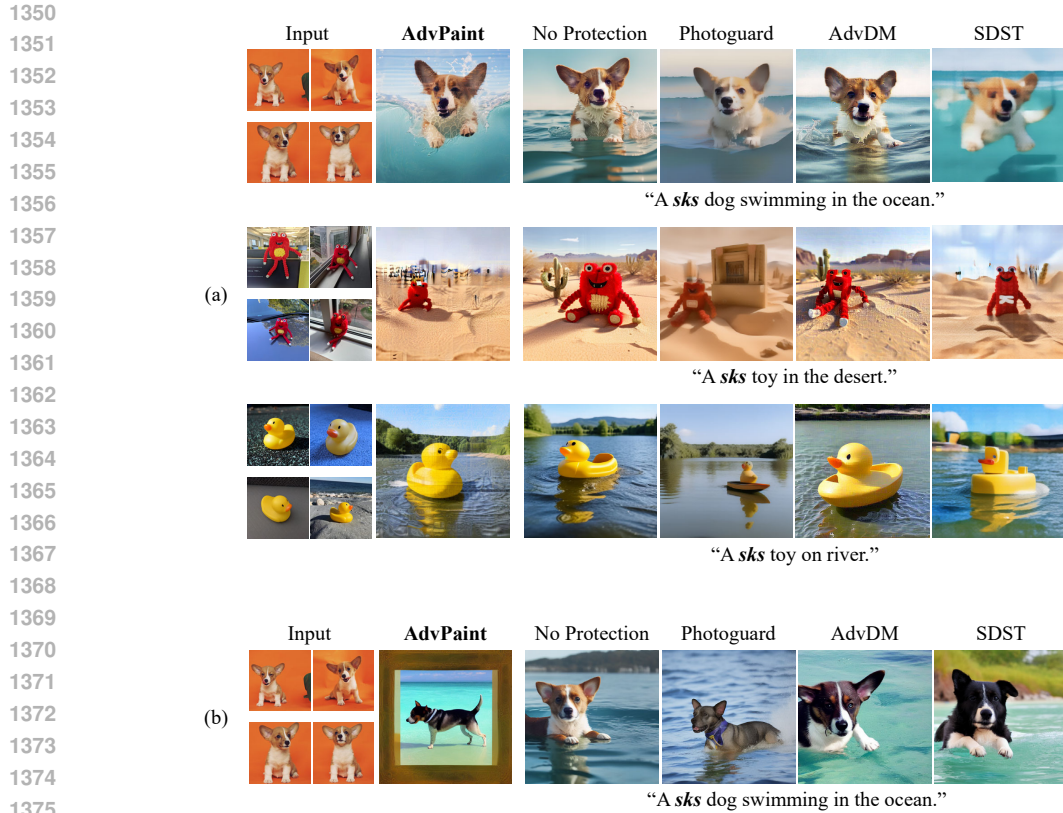

Figure 13: Comparison of text-to-image generation from (a) DiT-based DreamBooth (Chen et al., 2024) and (b) the original DreamBooth (Ruiz et al., 2022).

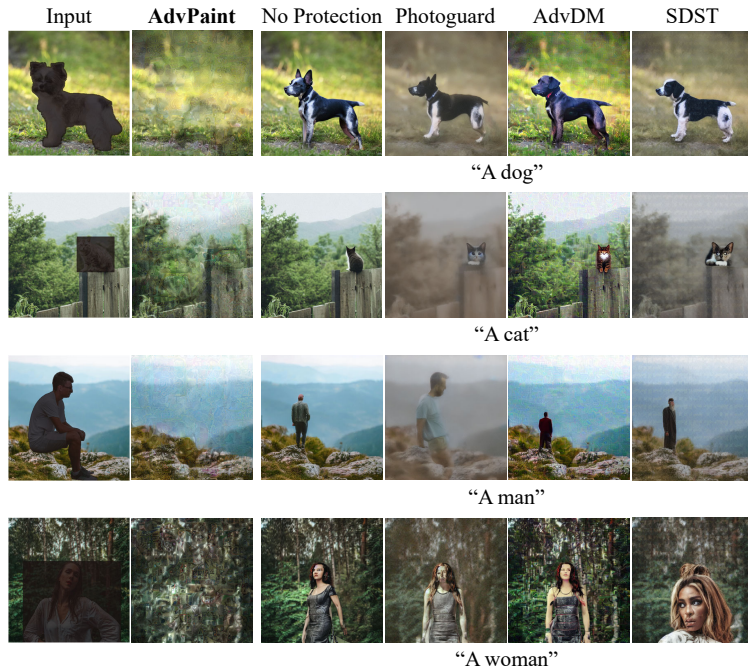

Figure 14: Qualitative results of foreground inpainting with prompts that describe the mask-covered object. Dark parts in the input image indicate the masked regions.

1404  
 1405  
 1406  
 1407  
 1408  
 1409  
 1410  
 1411  
 1412  
 1413  
 1414  
 1415  
 1416  
 1417  
 1418  
 1419  
 1420  
 1421  
 1422  
 1423  
 1424  
 1425  
 1426  
 1427  
 1428  
 1429  
 1430  
 1431  
 1432  
 1433  
 1434  
 1435  
 1436  
 1437  
 1438  
 1439  
 1440  
 1441  
 1442  
 1443  
 1444  
 1445  
 1446  
 1447  
 1448  
 1449  
 1450  
 1451  
 1452  
 1453  
 1454  
 1455  
 1456  
 1457

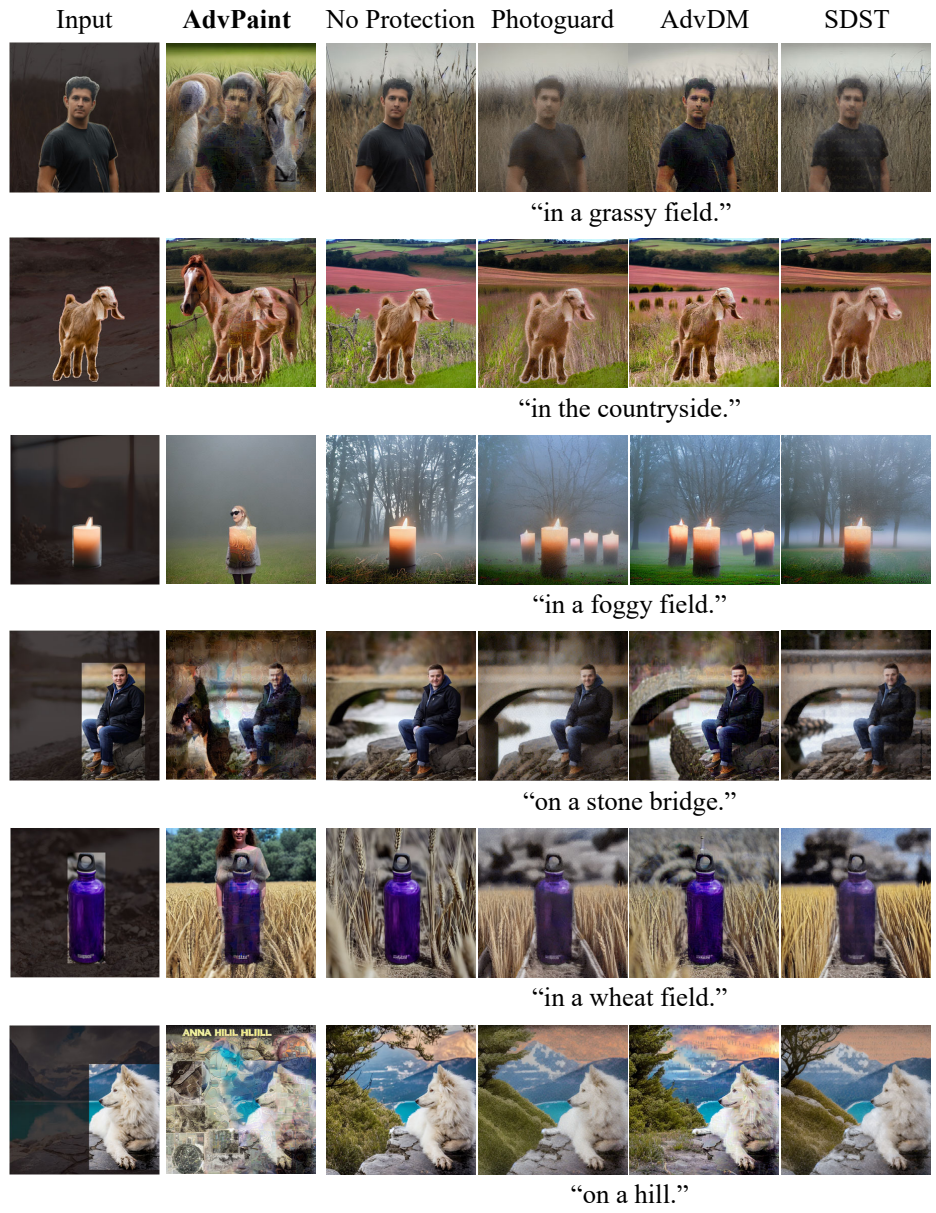

Figure 15: Qualitative results of background inpainting with prompts that follow the format of {preposition, location}. Dark parts in the input image indicate the masked regions.

1458  
 1459  
 1460  
 1461  
 1462  
 1463  
 1464  
 1465  
 1466  
 1467  
 1468  
 1469  
 1470  
 1471  
 1472  
 1473  
 1474  
 1475  
 1476  
 1477  
 1478  
 1479  
 1480  
 1481  
 1482  
 1483  
 1484  
 1485  
 1486  
 1487  
 1488  
 1489  
 1490  
 1491  
 1492  
 1493  
 1494  
 1495  
 1496  
 1497  
 1498  
 1499  
 1500  
 1501  
 1502  
 1503  
 1504  
 1505  
 1506  
 1507  
 1508  
 1509  
 1510  
 1511

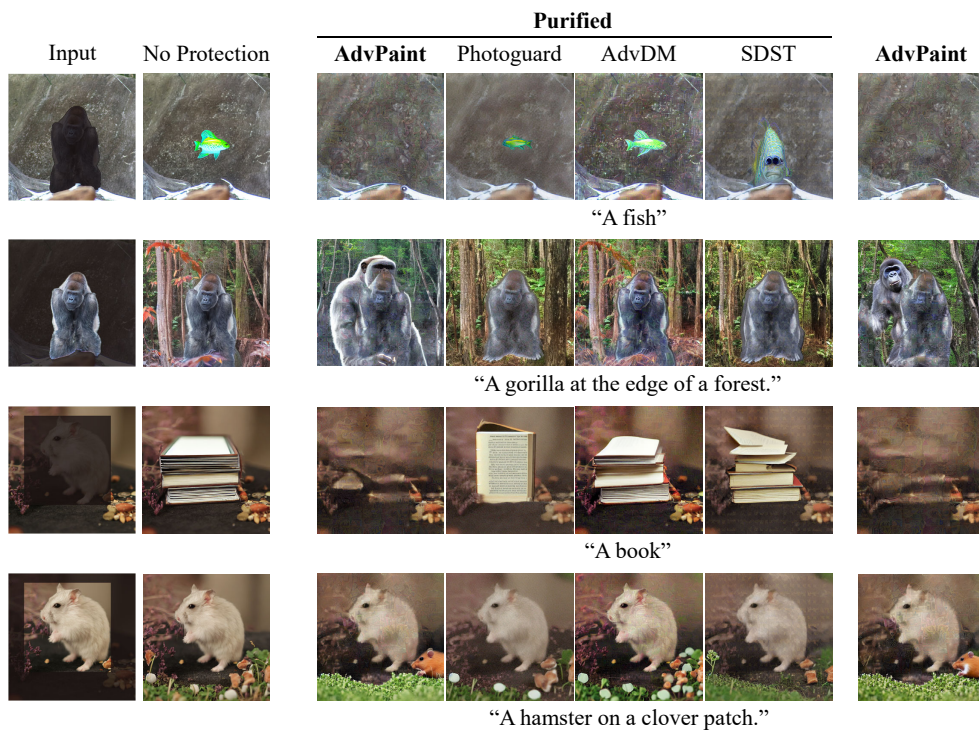

Figure 16: Qualitative inpainting results after applying IMPRESS (Cao et al., 2023). Dark parts in the input image indicate the masked regions.

1512  
 1513  
 1514  
 1515  
 1516  
 1517  
 1518  
 1519  
 1520  
 1521  
 1522  
 1523  
 1524  
 1525  
 1526  
 1527  
 1528  
 1529  
 1530  
 1531  
 1532  
 1533  
 1534  
 1535  
 1536  
 1537  
 1538  
 1539  
 1540  
 1541  
 1542  
 1543  
 1544  
 1545  
 1546  
 1547  
 1548  
 1549  
 1550  
 1551  
 1552  
 1553  
 1554  
 1555  
 1556  
 1557  
 1558  
 1559  
 1560  
 1561  
 1562  
 1563  
 1564  
 1565

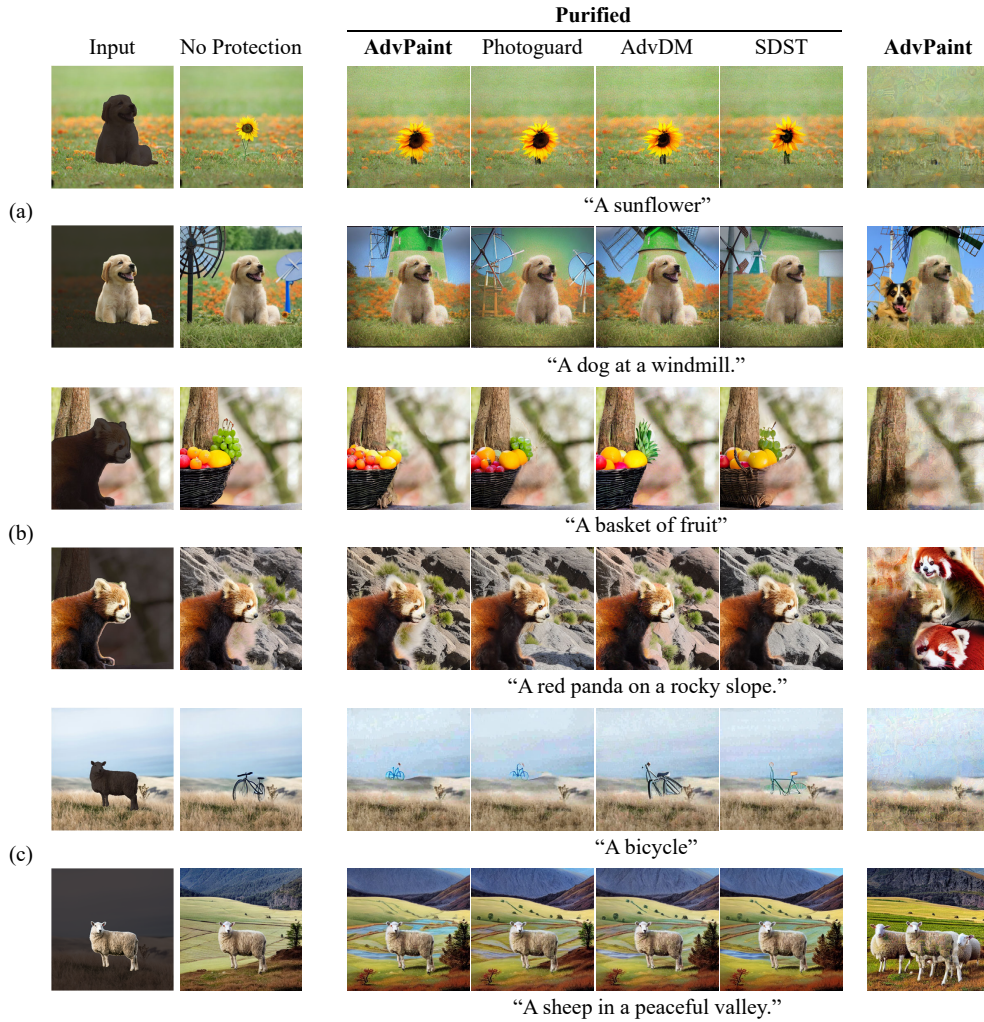

Figure 17: Qualitative inpainting results after applying (a) Gaussian Noise, (b) Upscaling (Honig et al., 2024), and (c) JPEG compression. Dark parts in the input image indicate the masked regions.



1566  
 1567  
 1568  
 1569  
 1570  
 1571  
 1572  
 1573  
 1574  
 1575  
 1576  
 1577  
 1578  
 1579  
 1580  
 1581  
 1582  
 1583  
 1584  
 1585  
 1586  
 1587  
 1588  
 1589  
 1590  
 1591  
 1592  
 1593  
 1594  
 1595  
 1596  
 1597  
 1598  
 1599  
 1600  
 1601  
 1602  
 1603  
 1604  
 1605  
 1606  
 1607  
 1608  
 1609  
 1610  
 1611  
 1612  
 1613  
 1614  
 1615  
 1616  
 1617  
 1618  
 1619

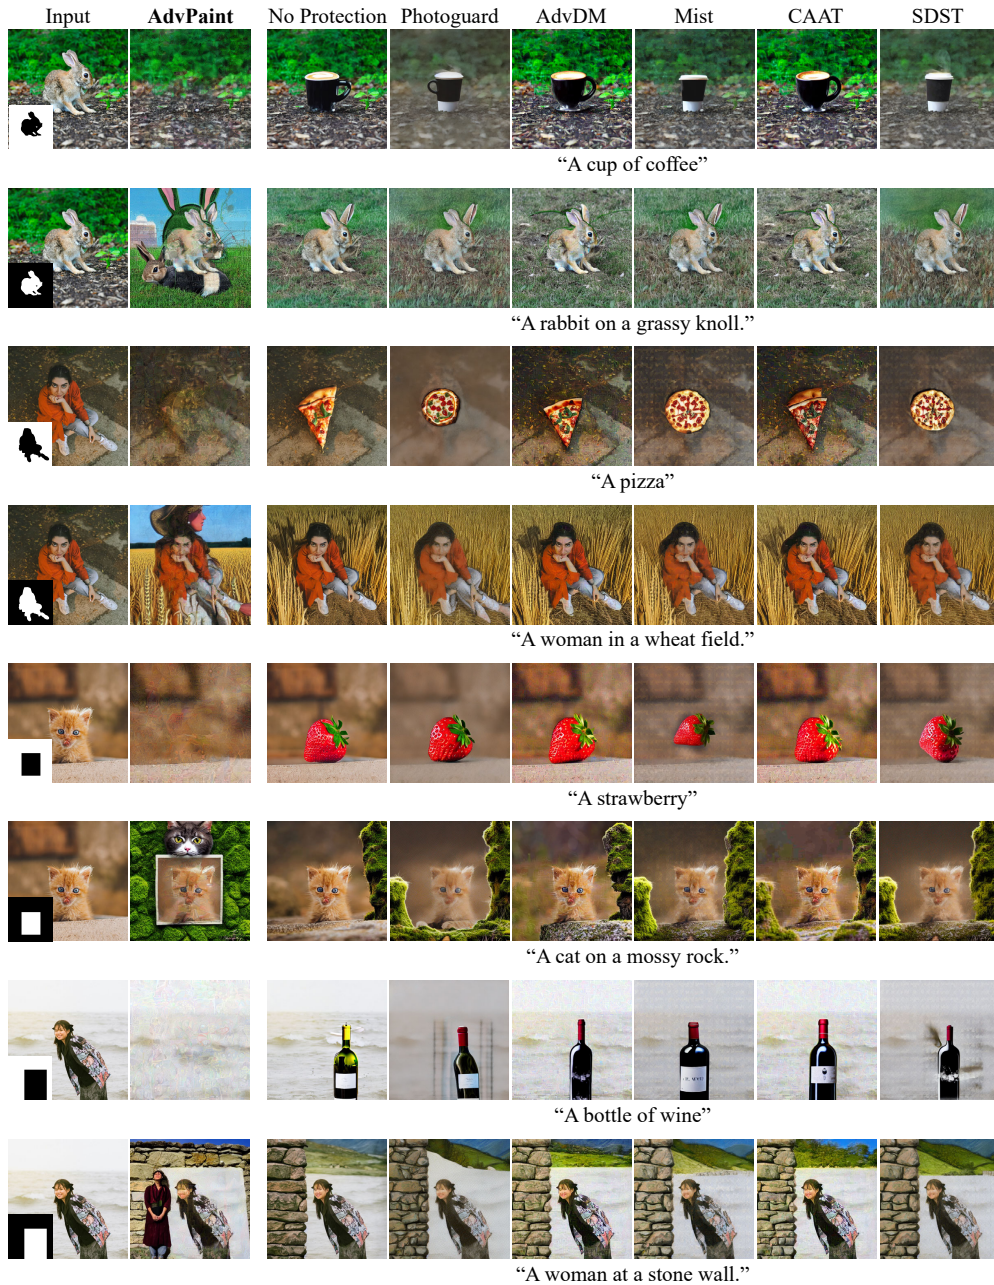

Figure 18: Qualitative results of inpainting tasks using segmentation mask  $m^{seg}$  and bounding box mask  $m^{bb}$ , comparing with prior methods.

1620  
1621  
1622  
1623  
1624  
1625  
1626  
1627  
1628  
1629  
1630  
1631  
1632  
1633  
1634  
1635  
1636  
1637  
1638  
1639  
1640  
1641  
1642  
1643  
1644  
1645  
1646  
1647  
1648  
1649  
1650  
1651  
1652  
1653  
1654  
1655  
1656  
1657  
1658  
1659  
1660  
1661  
1662  
1663  
1664  
1665  
1666  
1667  
1668  
1669  
1670  
1671  
1672  
1673

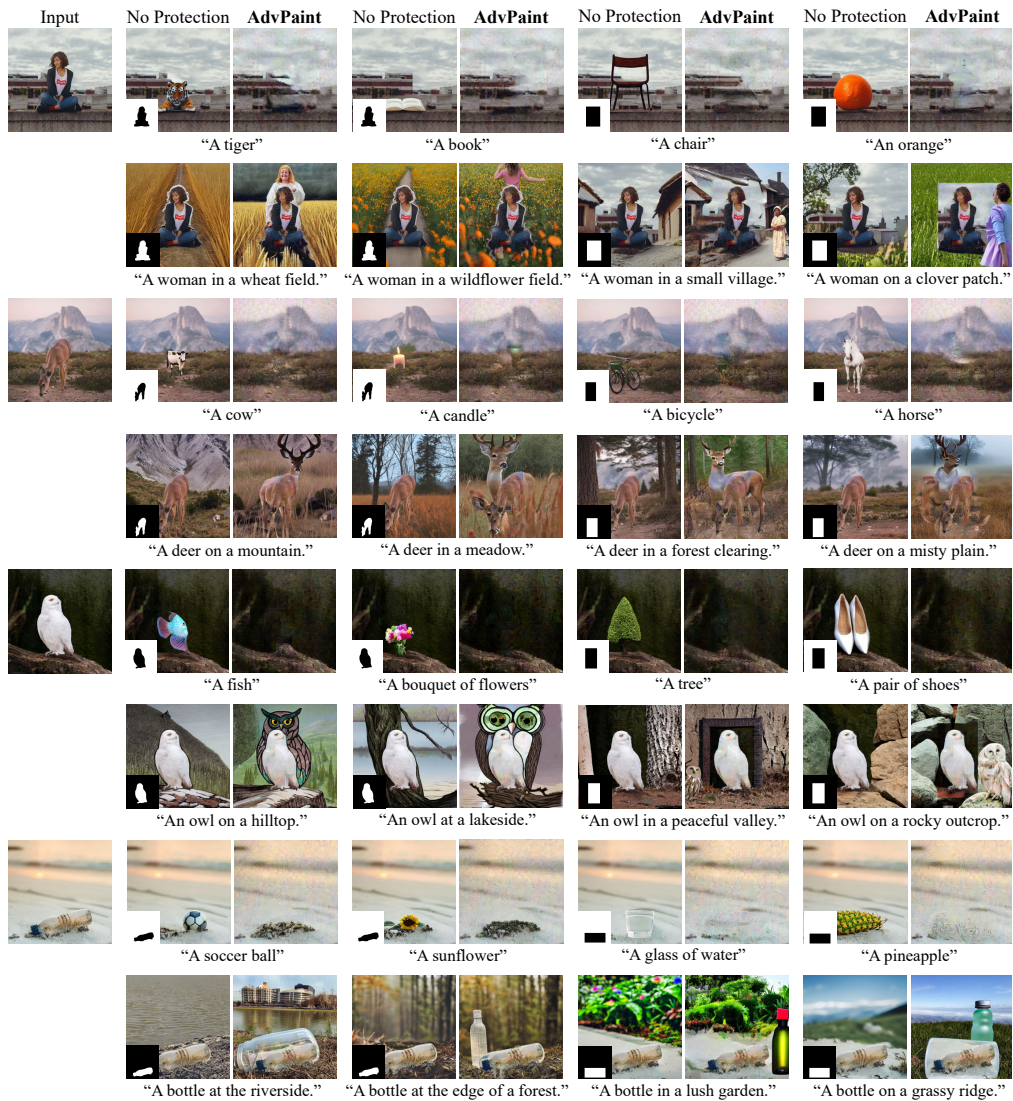

Figure 19: Qualitative results of our approach on inpainting tasks with masks  $m^{seg}$ ,  $m^{bb}$ , and the optimization mask  $m$ .

1674  
1675  
1676  
1677  
1678  
1679  
1680  
1681  
1682  
1683  
1684  
1685  
1686  
1687  
1688  
1689  
1690  
1691  
1692  
1693  
1694  
1695  
1696  
1697  
1698  
1699  
1700  
1701  
1702  
1703  
1704  
1705  
1706  
1707  
1708  
1709  
1710  
1711  
1712  
1713  
1714  
1715  
1716  
1717  
1718  
1719  
1720  
1721  
1722  
1723  
1724  
1725  
1726  
1727

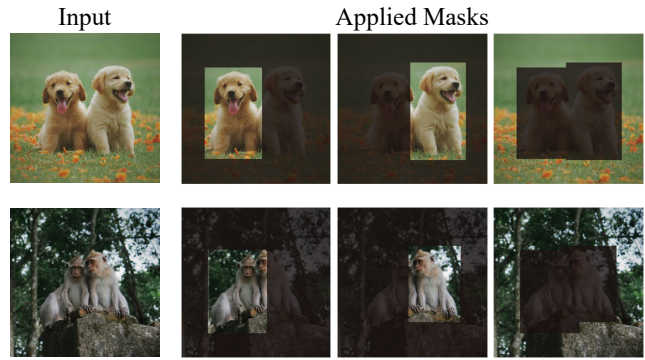

Figure 20: Masks used in optimization process of multi-object images. We utilize enlarged bounding box generated by Grounded SAM. Dark parts in the input image indicate the masked regions.

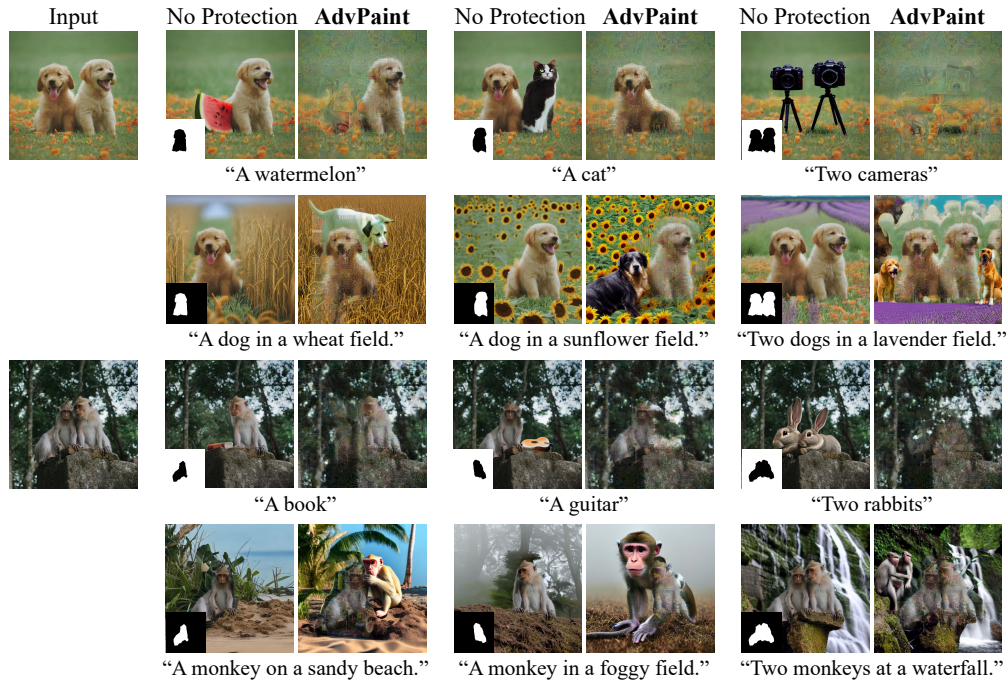

Figure 21: Qualitative results of inpainting tasks for multi-object images.

1728  
 1729  
 1730  
 1731  
 1732  
 1733  
 1734  
 1735  
 1736  
 1737  
 1738  
 1739  
 1740  
 1741  
 1742  
 1743  
 1744  
 1745  
 1746  
 1747  
 1748  
 1749  
 1750  
 1751  
 1752  
 1753  
 1754  
 1755  
 1756  
 1757  
 1758  
 1759  
 1760  
 1761  
 1762  
 1763  
 1764  
 1765  
 1766  
 1767  
 1768  
 1769  
 1770  
 1771  
 1772  
 1773  
 1774  
 1775  
 1776  
 1777  
 1778  
 1779  
 1780  
 1781

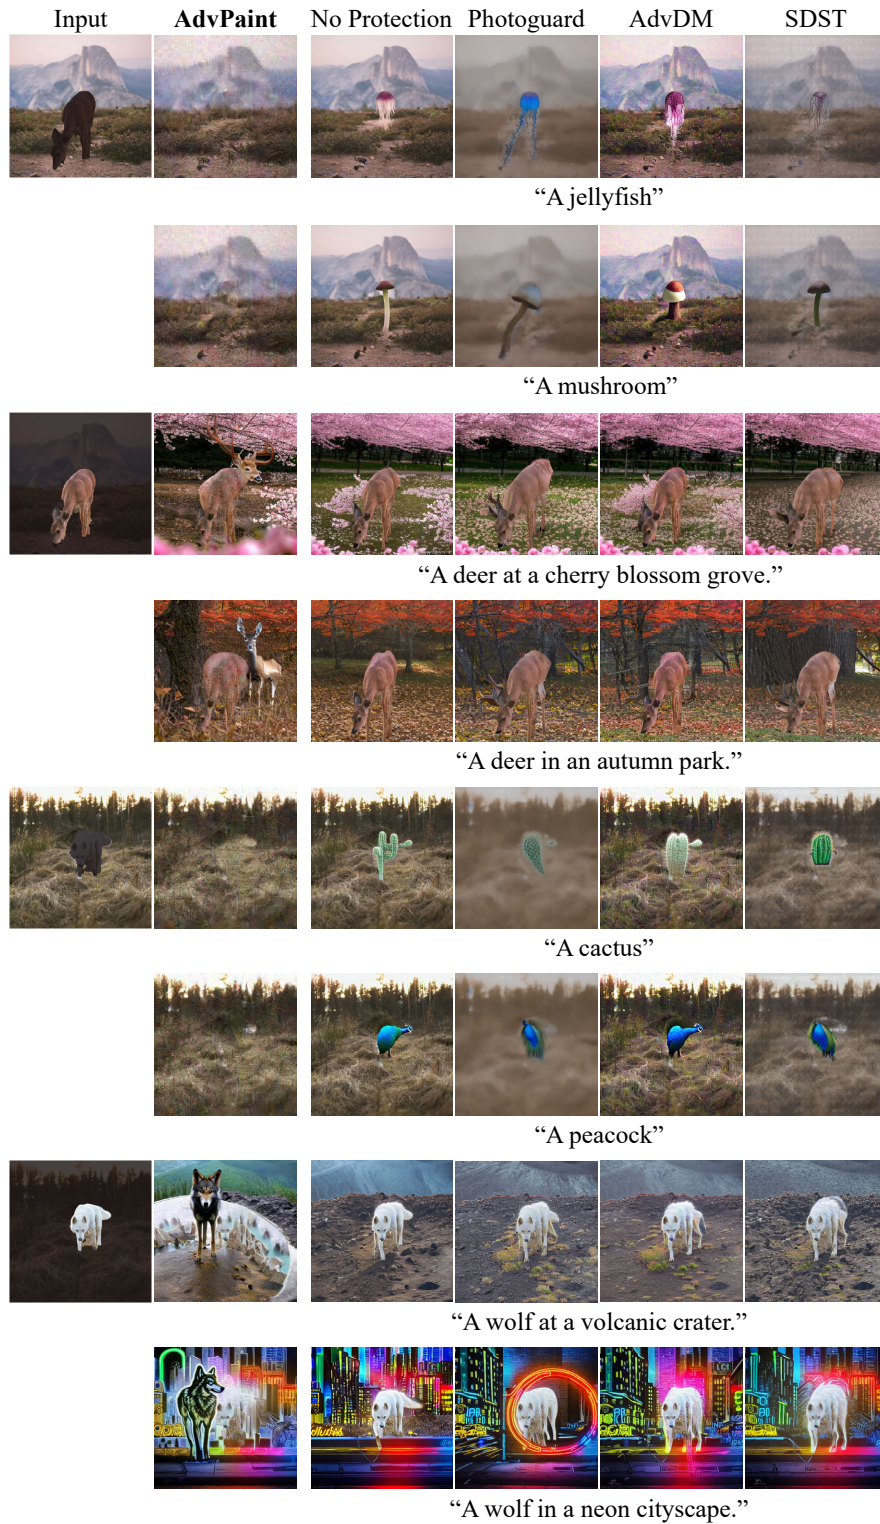

Figure 22: Qualitative results of inpainting tasks with prompts and masks generated from alternative resources. Dark parts in the input image indicate the masked regions.

1782  
1783  
1784  
1785  
1786  
1787  
1788  
1789  
1790  
1791  
1792  
1793  
1794  
1795  
1796  
1797  
1798

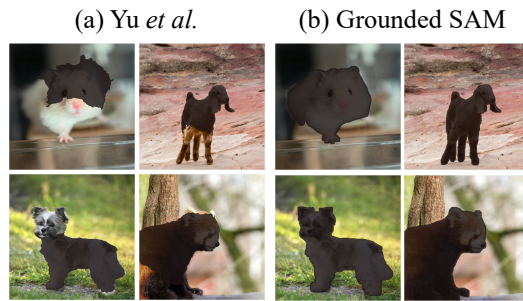

1799 Figure 23: Qualitative results of inpainting tasks with prompts and masks generated from alternative  
1800 resources. Dark parts in the input image indicate the masked regions.

1801  
1802  
1803  
1804  
1805  
1806  
1807  
1808  
1809  
1810  
1811  
1812  
1813  
1814  
1815  
1816  
1817  
1818  
1819  
1820  
1821  
1822  
1823  
1824  
1825  
1826  
1827  
1828  
1829  
1830  
1831  
1832

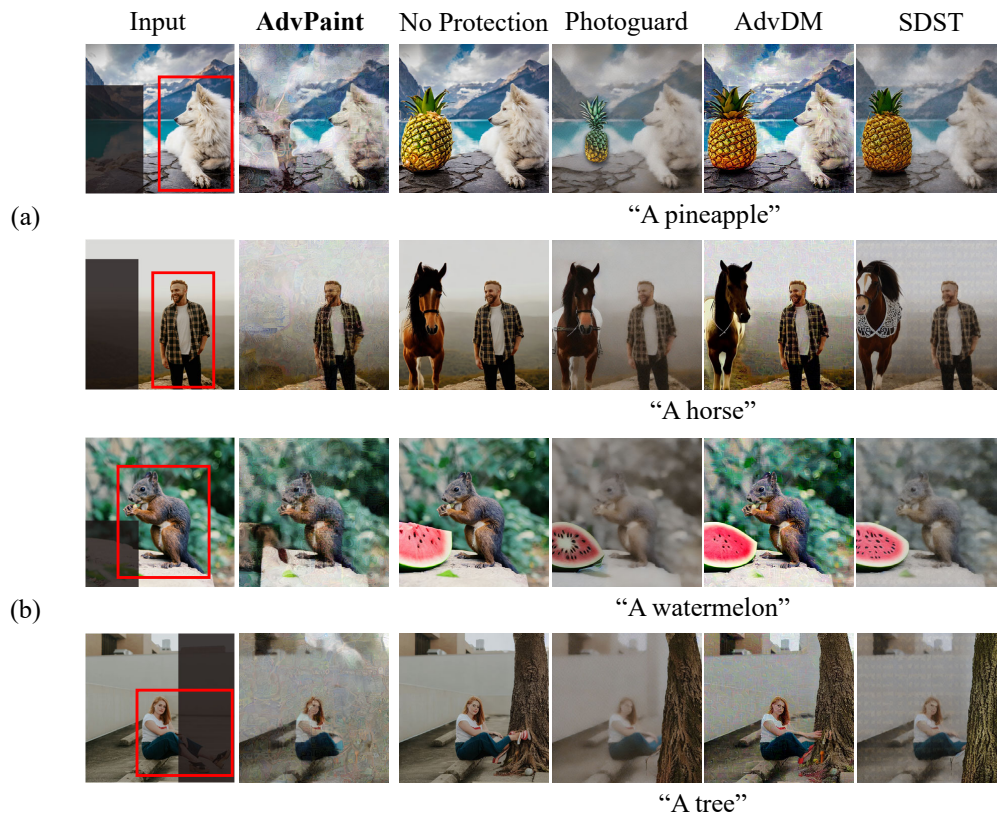

1833 Figure 24: Qualitative inpainting results where (a) masks exceed or (b) overlap with the optimization  
1834 boundary (highlighted in red lines). Dark parts in the input image indicate the masked regions.

1835
